# Supplementary material
Source: MDPI journal article supplement (https://www.mdpi.com/2071-1050/9/7/1089)
Supplement: s1 [file s1]

Block 195, Flat 1  
Amuwo-Odofin Estate  
Lagos, Nigeria

+234 812 385 2992  
+234 805 223 7467  
tobiaikomo@yahoo.com

**Oluwatobi Aikomo Inc.**

6<sup>th</sup> June, 2017

**To Whom It May Concern**

## **CERTIFICATE OF EDITING**

This document certifies that the paper listed below was edited for proper English language, grammar, punctuation, spelling, and overall style by Oluwatobi Aikomo, an expert in English language, editing and proofreading. Neither the research content nor the author's intentions were altered in any way during the editing process.

Title of Paper:

**The Potential of Animal By-Products in Food Systems: Production, Prospects and Challenges**

Authors:

**Babatunde O. Alao, Andrew B. Falowo, Amanda Chulayo, Voster Muchenje**

Date Issued:

**6<sup>th</sup> June, 2017**

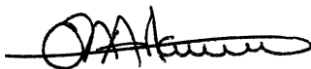

---

For: Oluwatobi Aikomo Inc.
